# Supplementary material for: Structural Insights into the Inhibition of Cytosolic 5′-Nucleotidase II (cN-II) by Ribonucleoside 5′-Monophosphate Analogues
Source: PLOS journal article supplement (doi:10.1371/journal.pcbi.1002295), 2011-12-08
Supplement: S1 (10.1371/journal.pcbi.1002295.s001) [file journal.pcbi.1002295.s001]

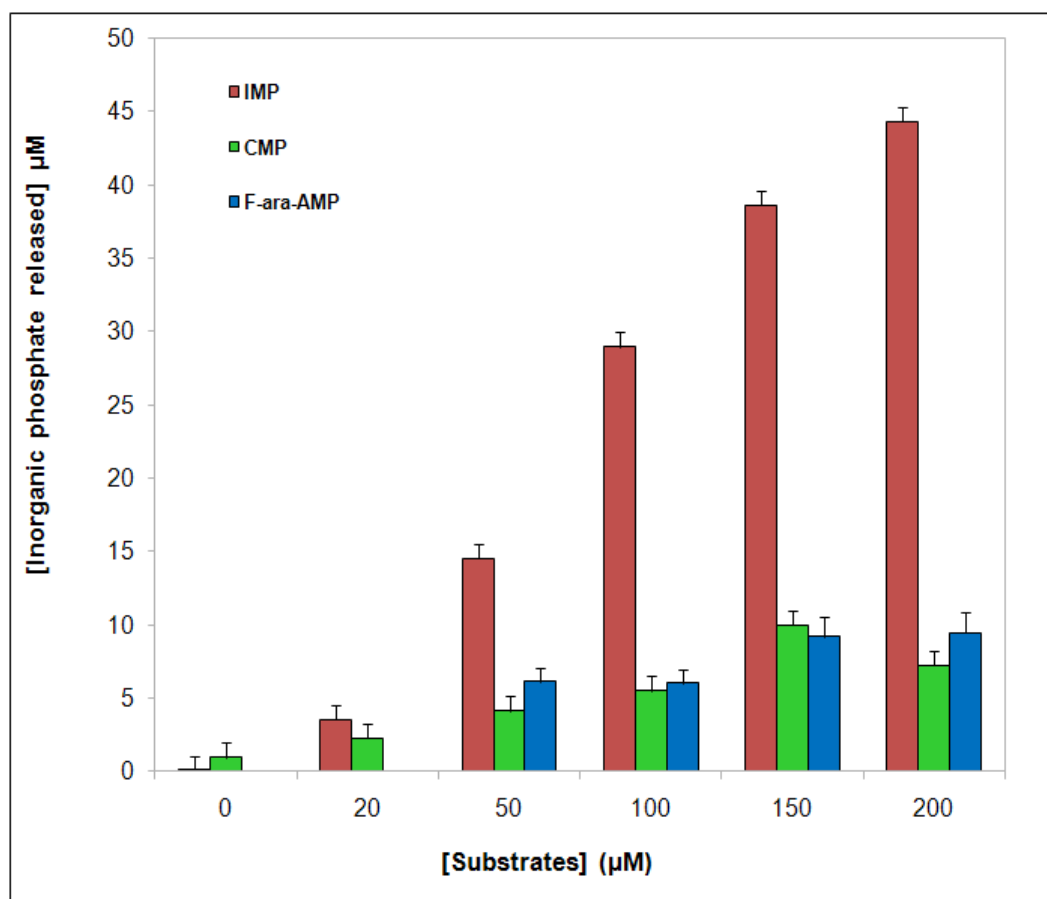

**Figure S1**
